# Supplementary material for: miR579-3p is an inhibitory modulator of neointimal hyperplasia and transcription factors c-MYB and KLF4
Source: PubMed Central journal article supplement (PMC9946956; doi:10.1038/s41420-023-01364-7), 2023-02-22

# Figure 2D

aSMA

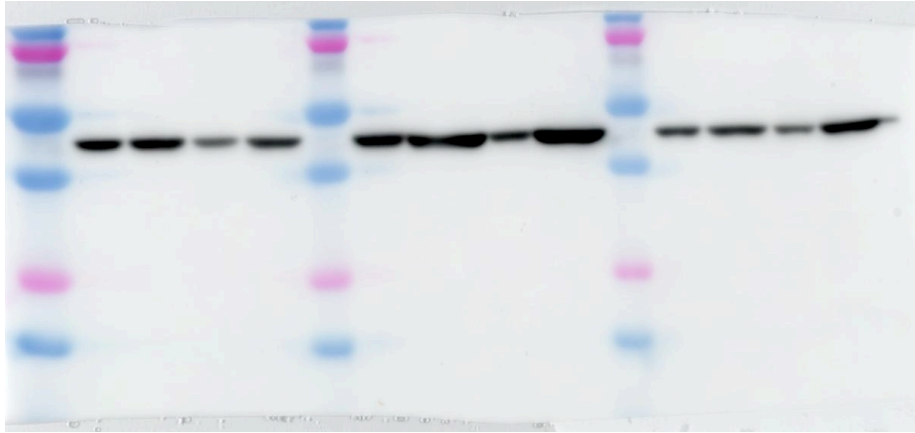

SM22a

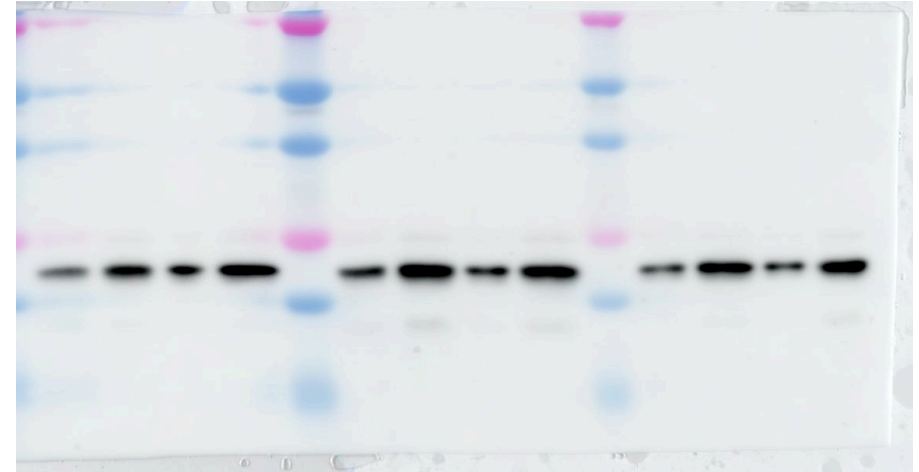

Calponin

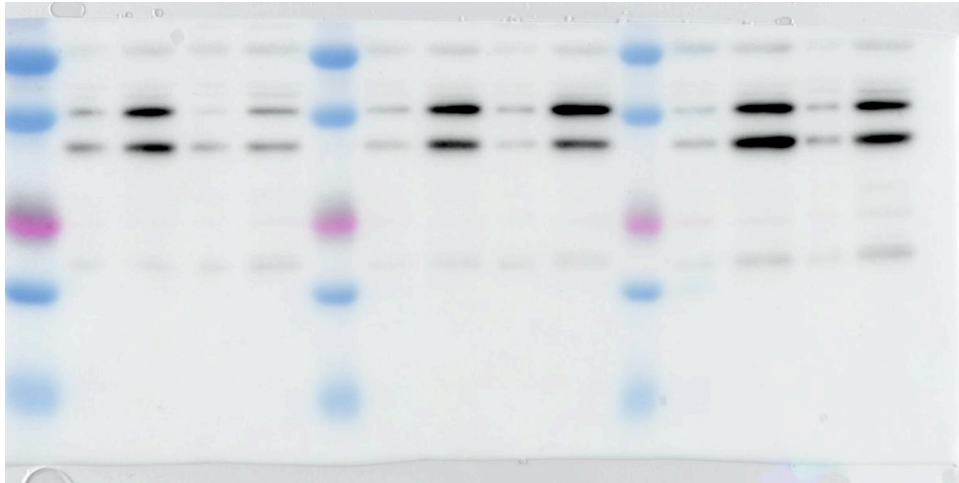

MYH11

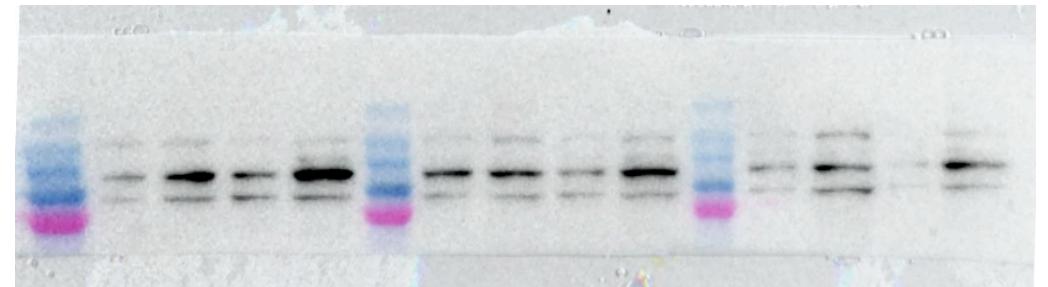

**Figure 2D**

KLF4

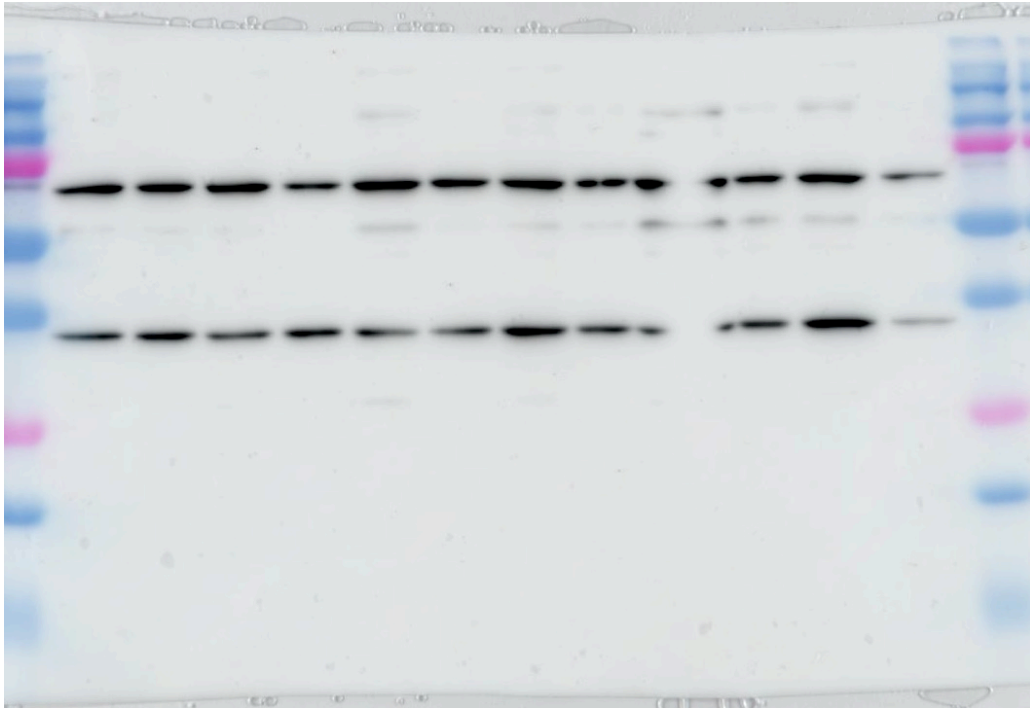

GAPDH

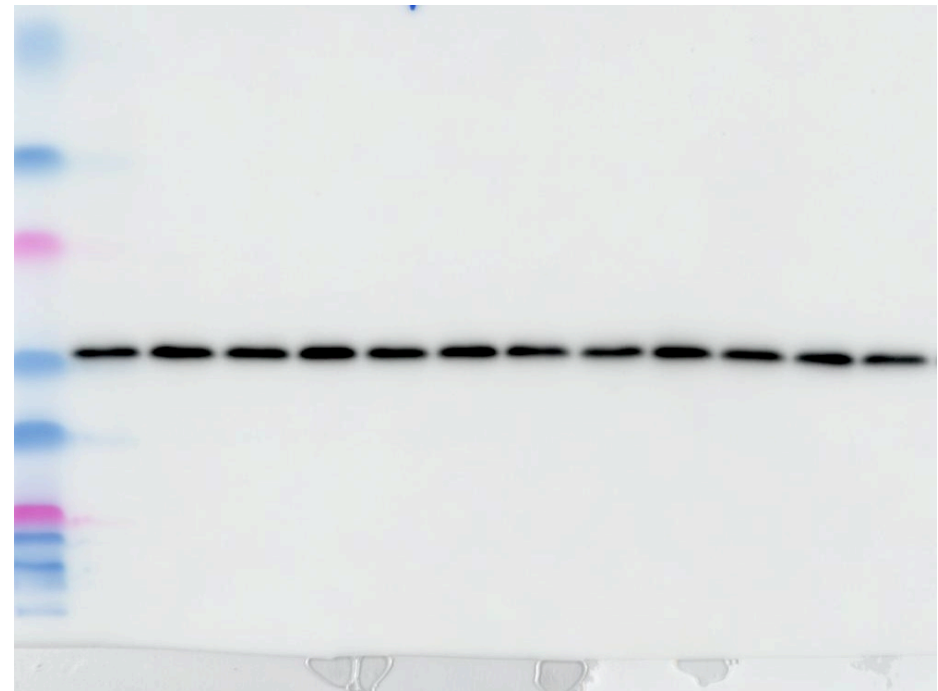

Figure 3E

C-MYB

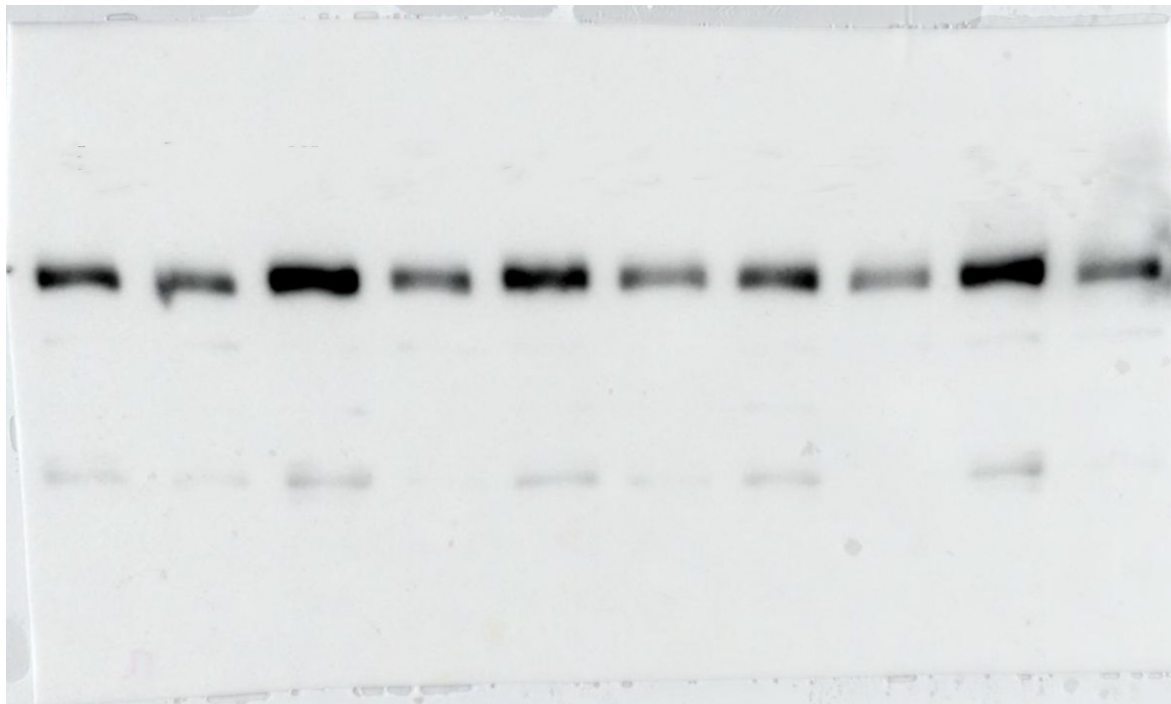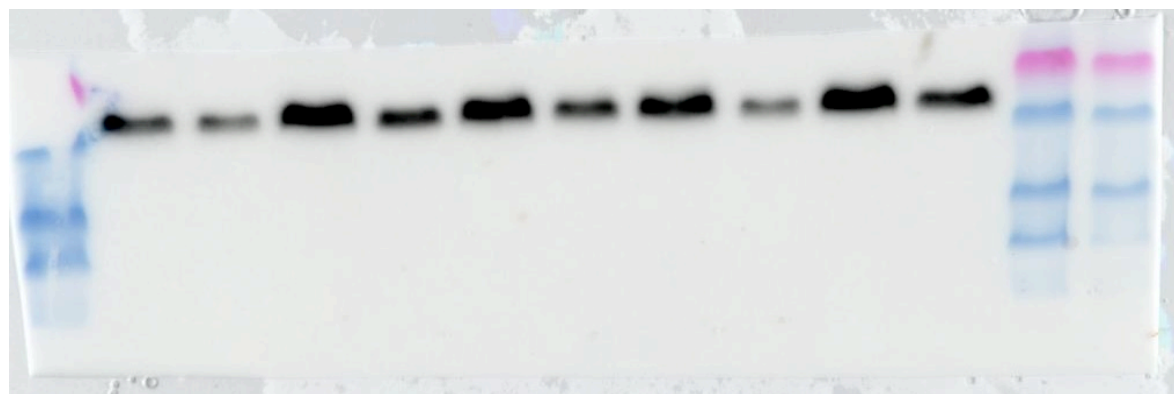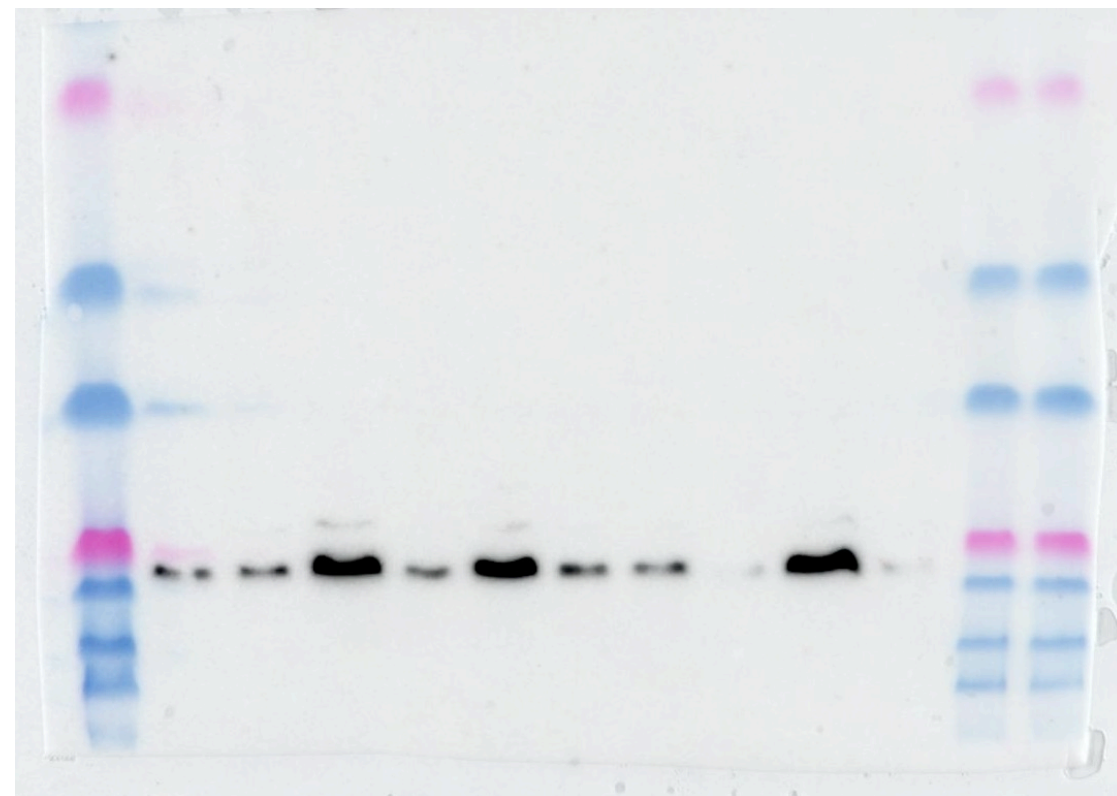

**Figure 3E**

P-MEK

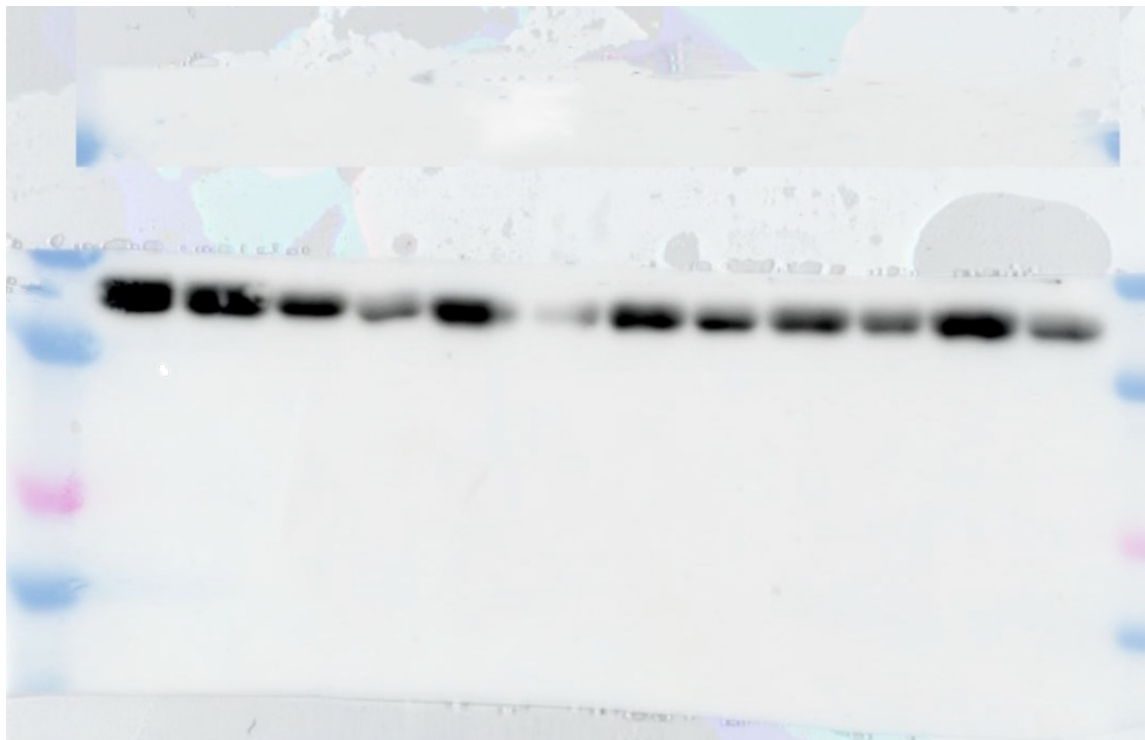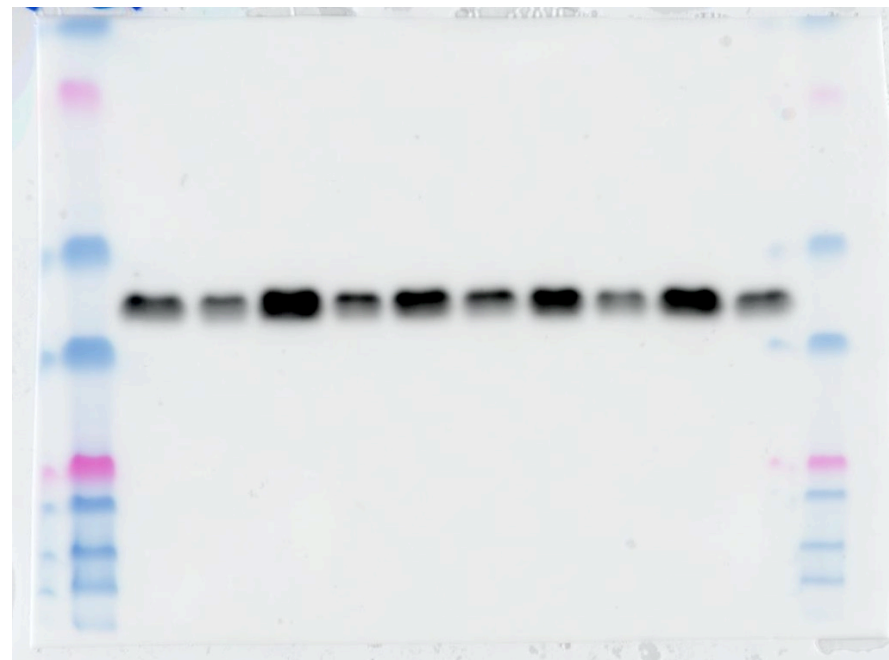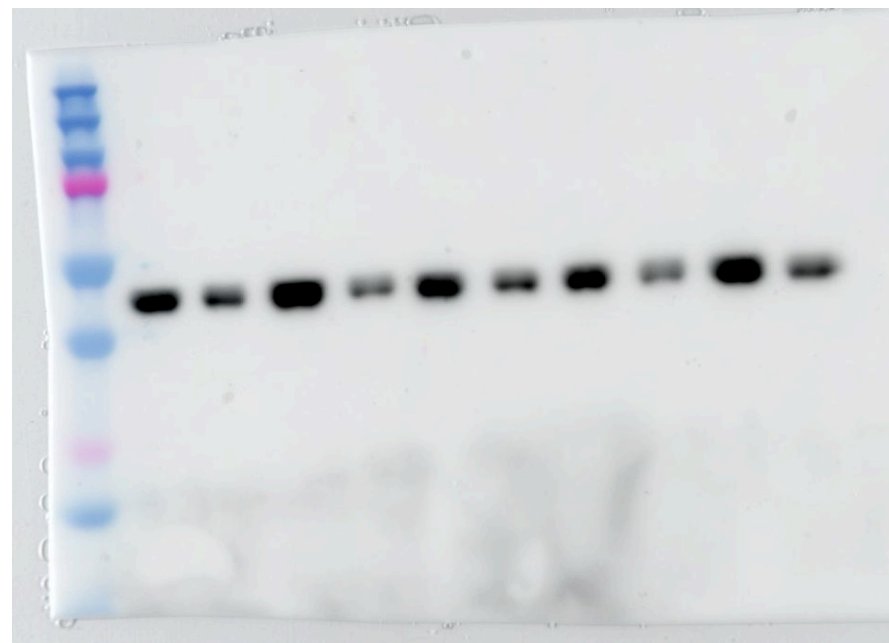

Figure 3E

P-ERK

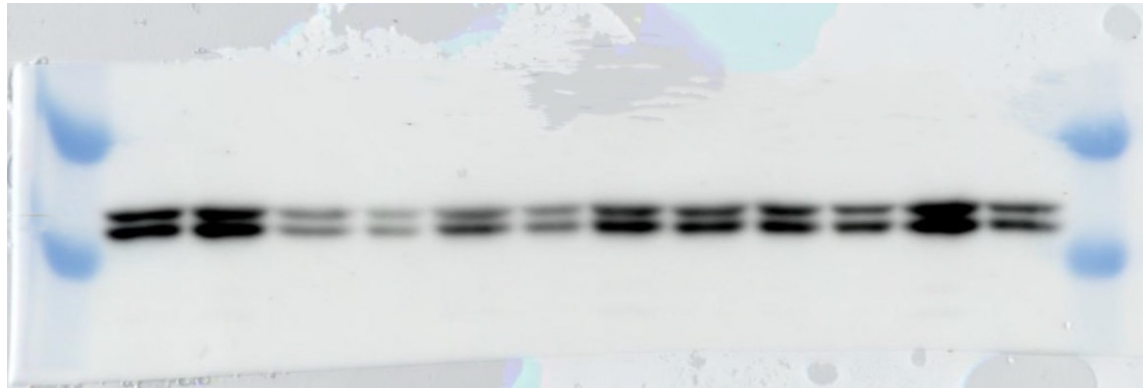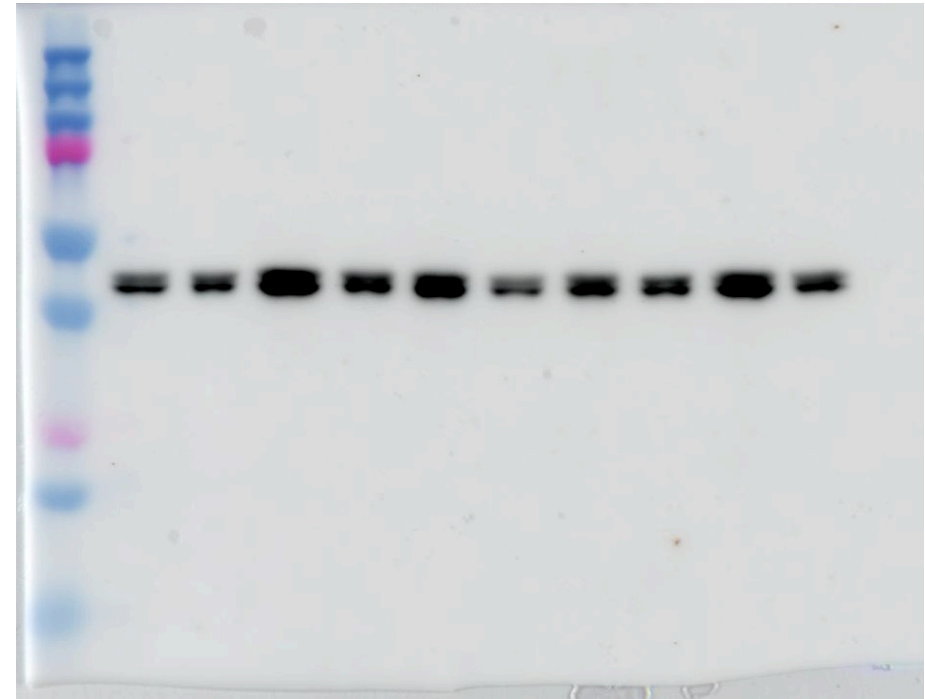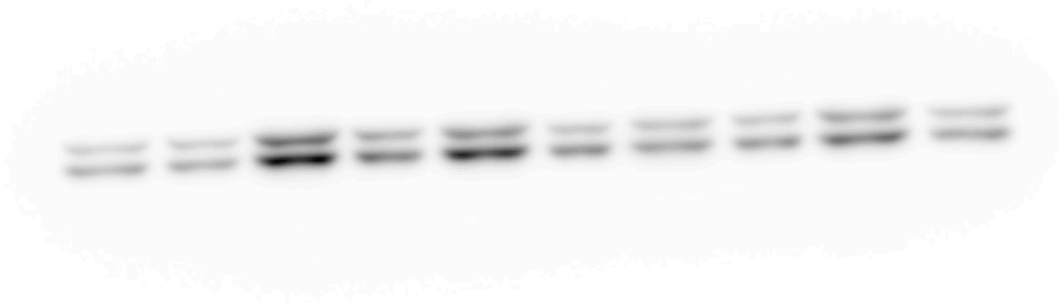



**Figure 3E**

Cyclin D1

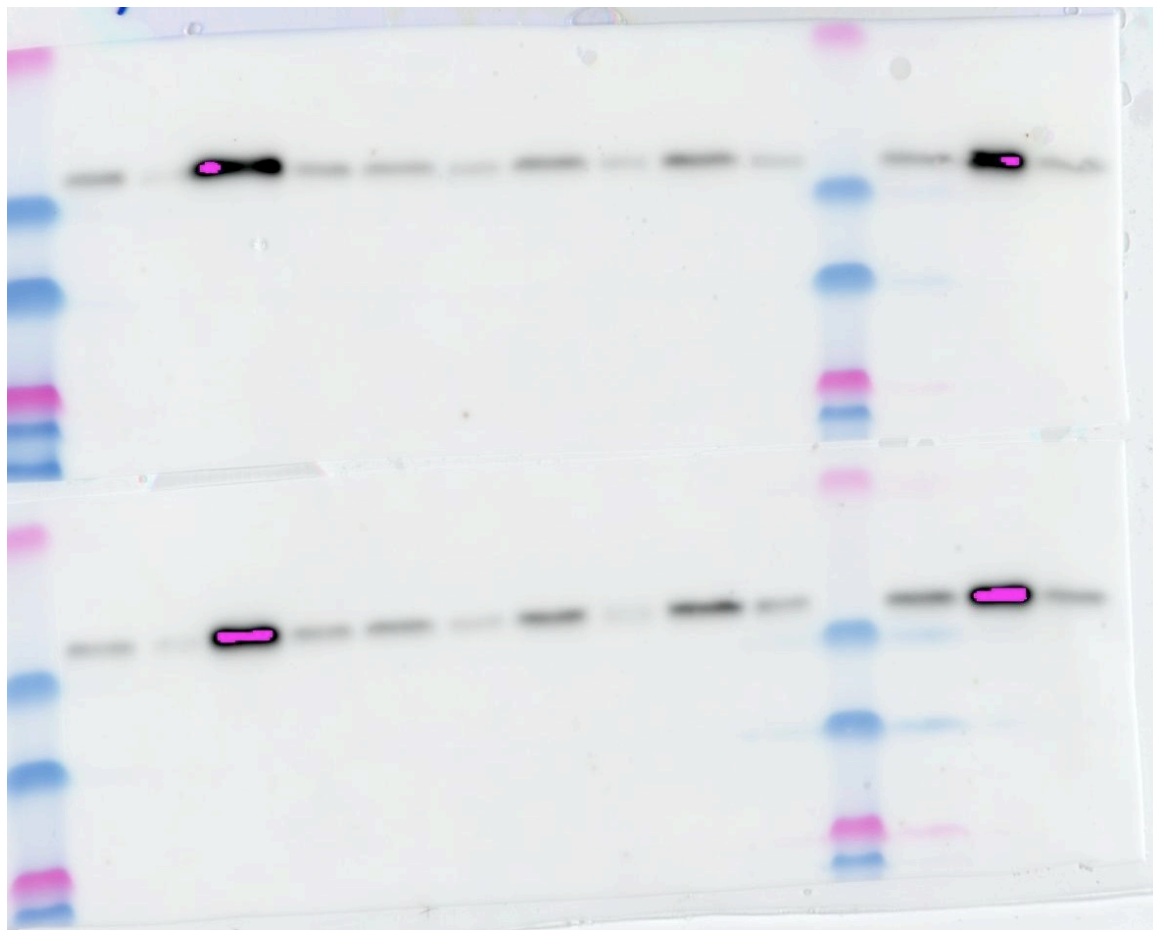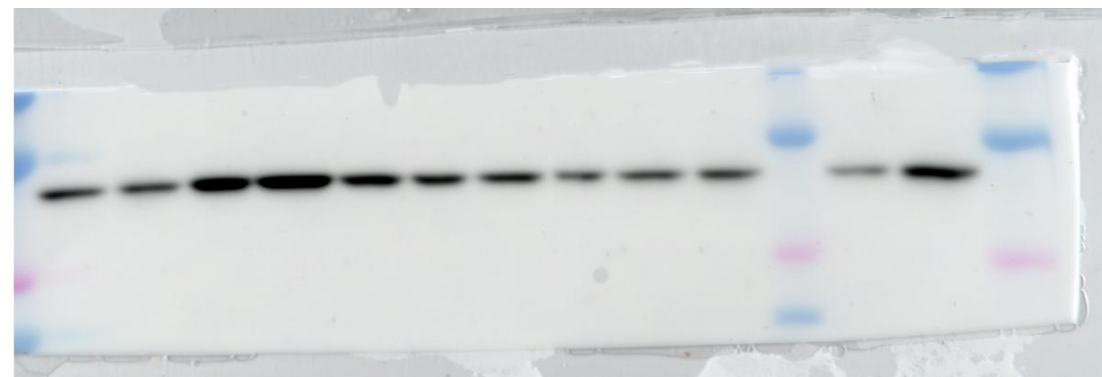

Figure 3E

C-MYC

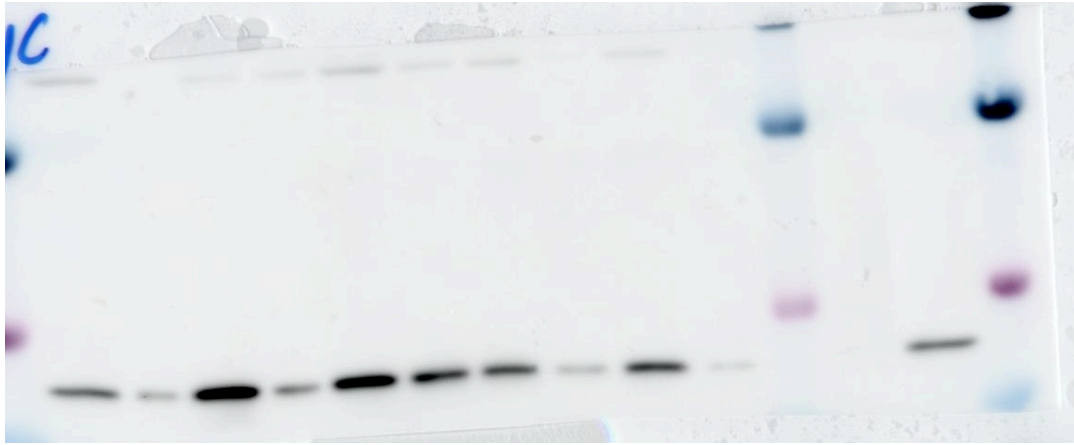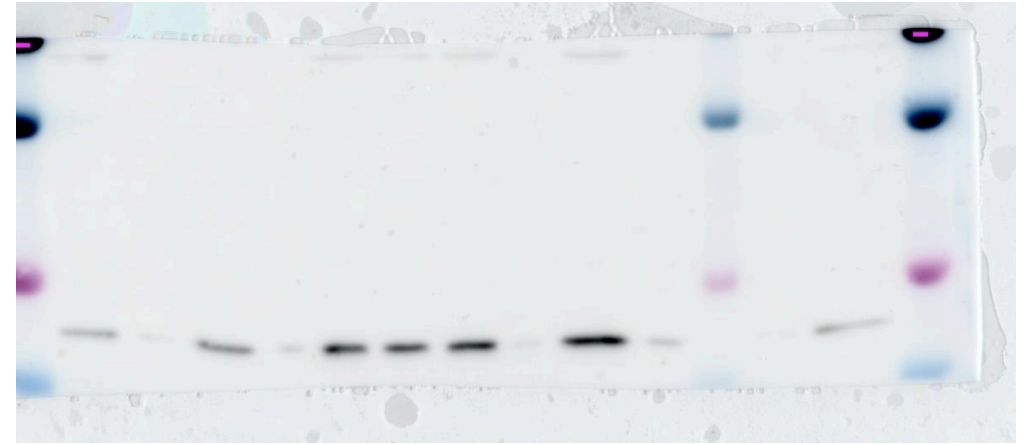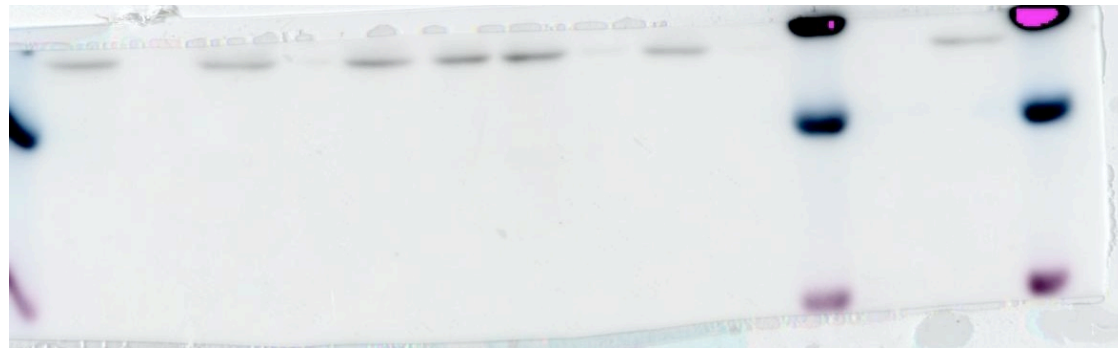

Figure 3E

GAPDH

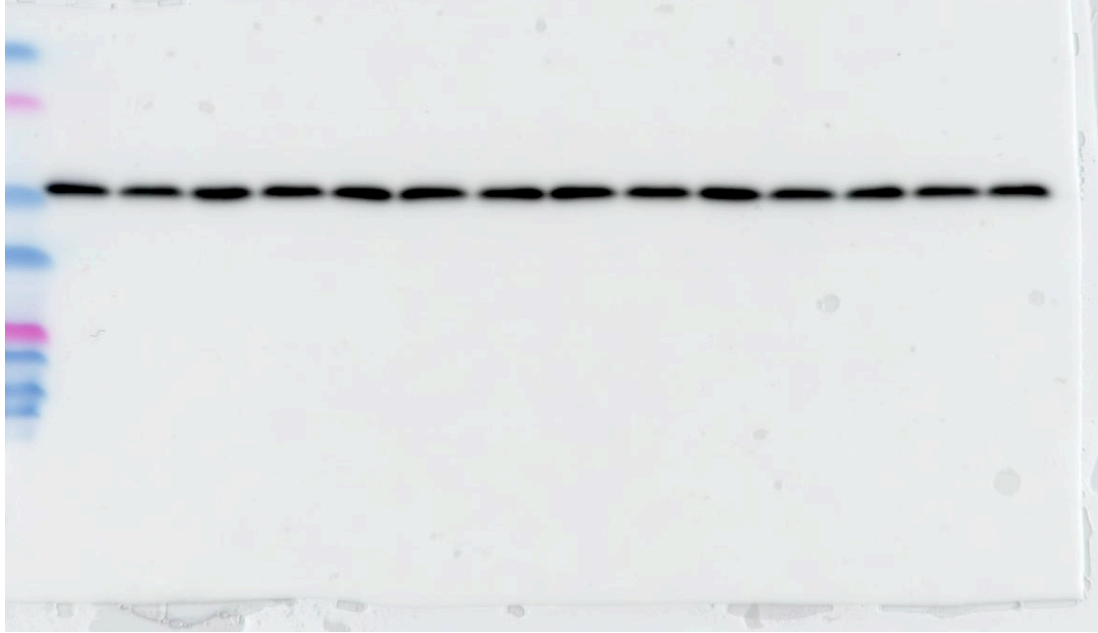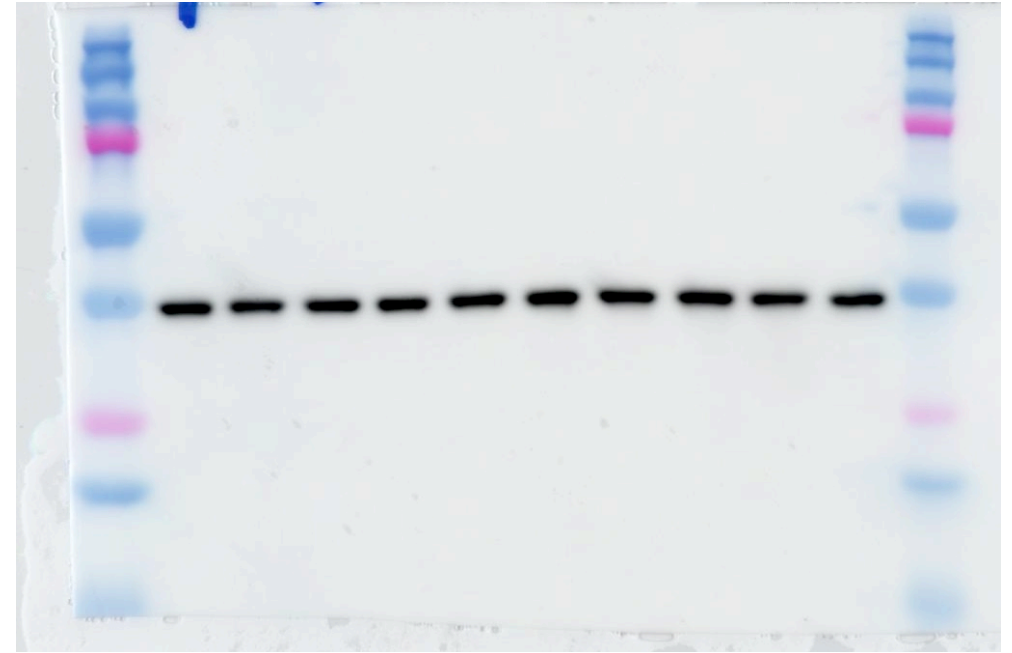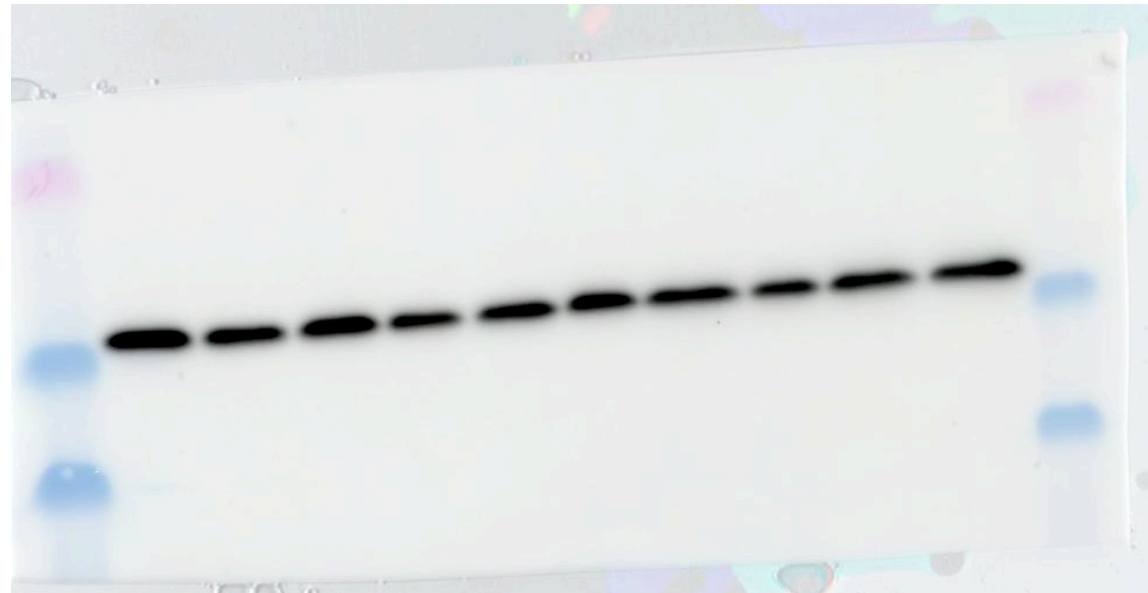



Figure 3J

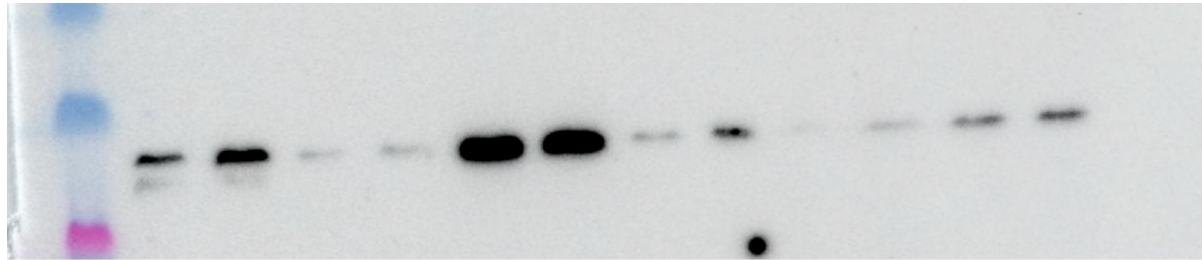

C-MYB

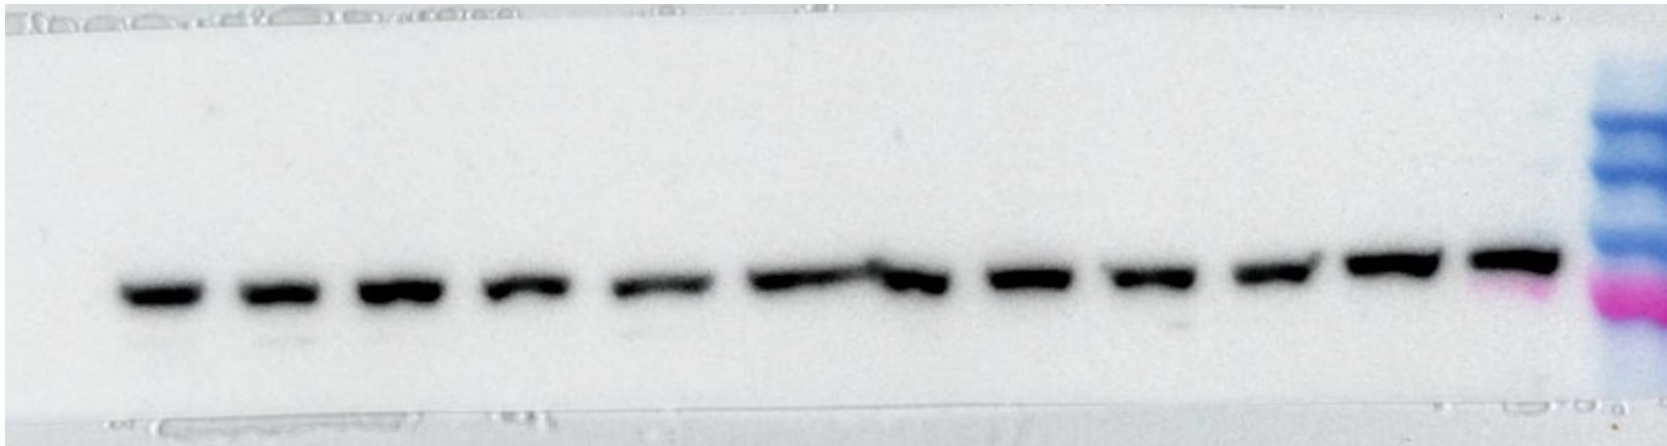

**Figure 3J**

P-MEK

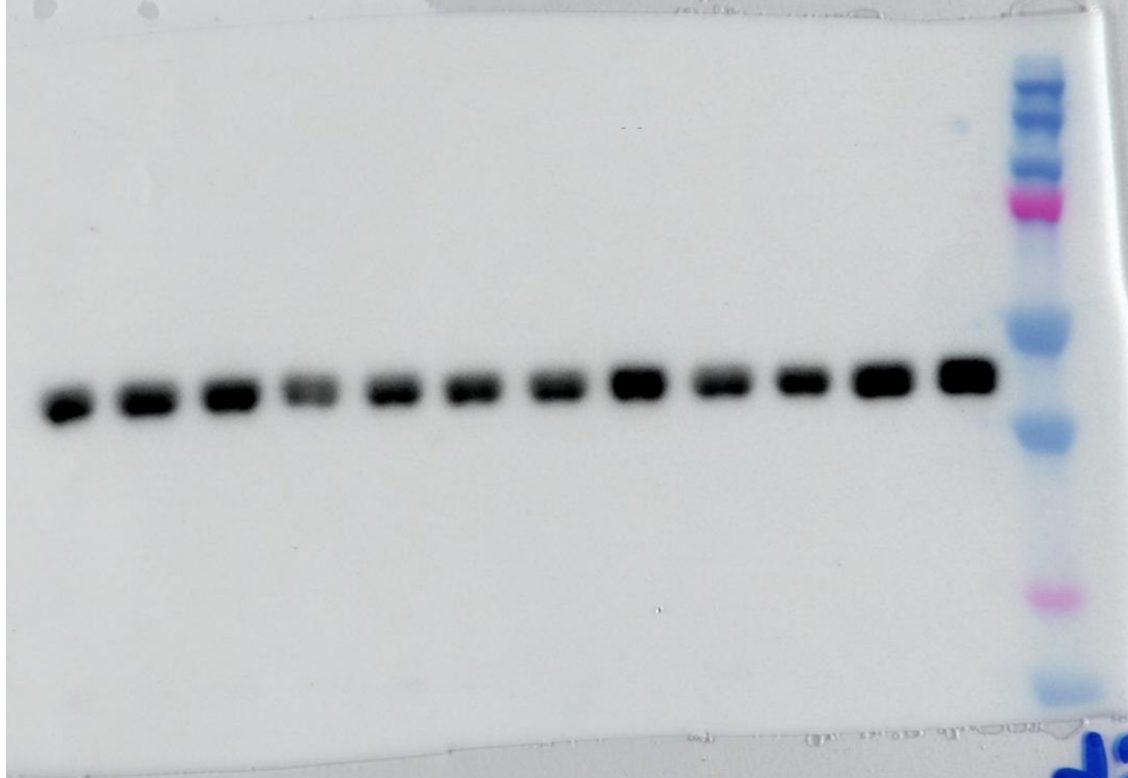

P-ERK

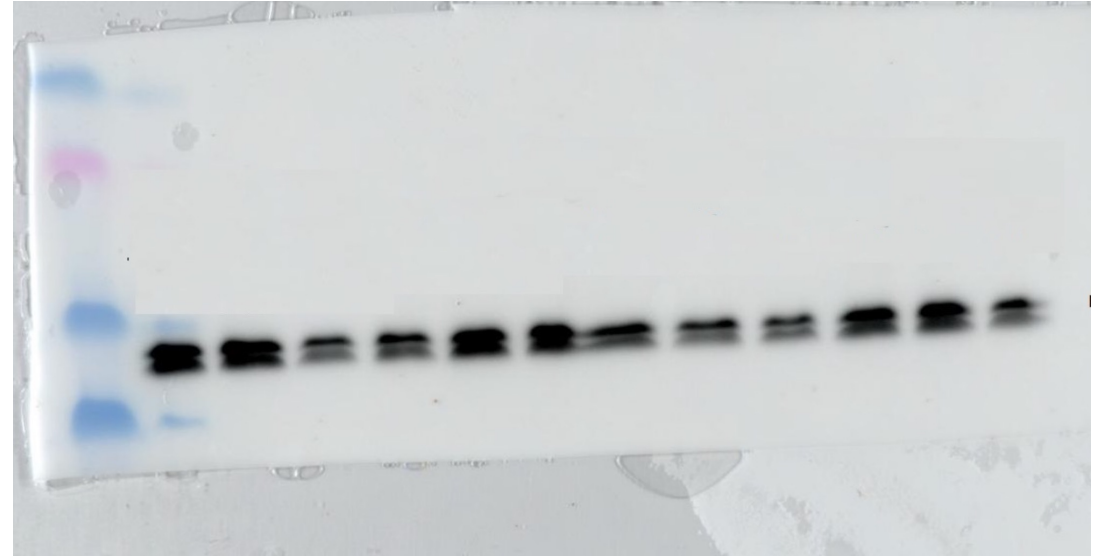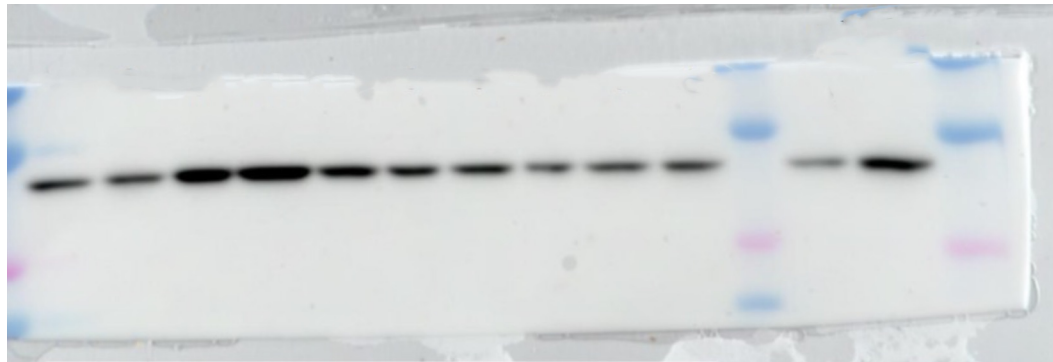

Cyclin D1

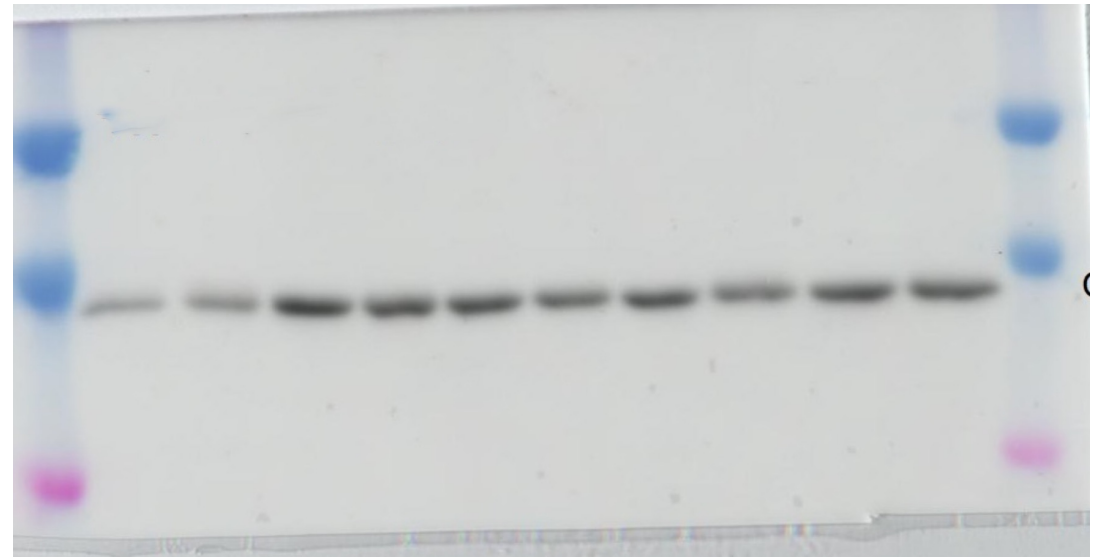

**Figure 3J**

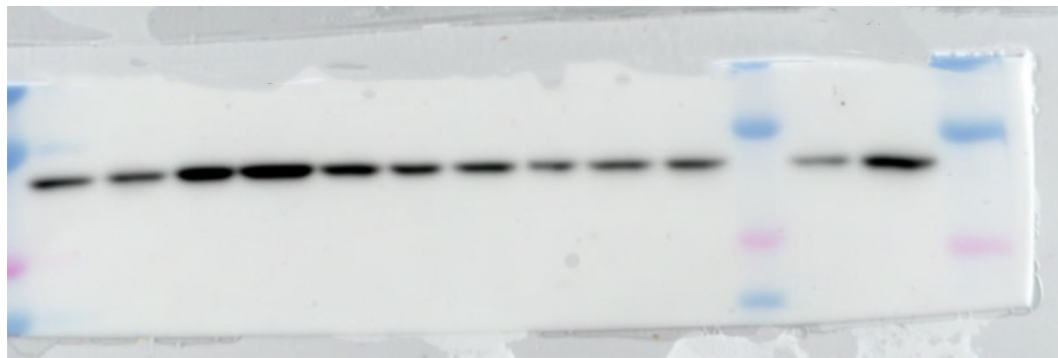

Cyclin D1

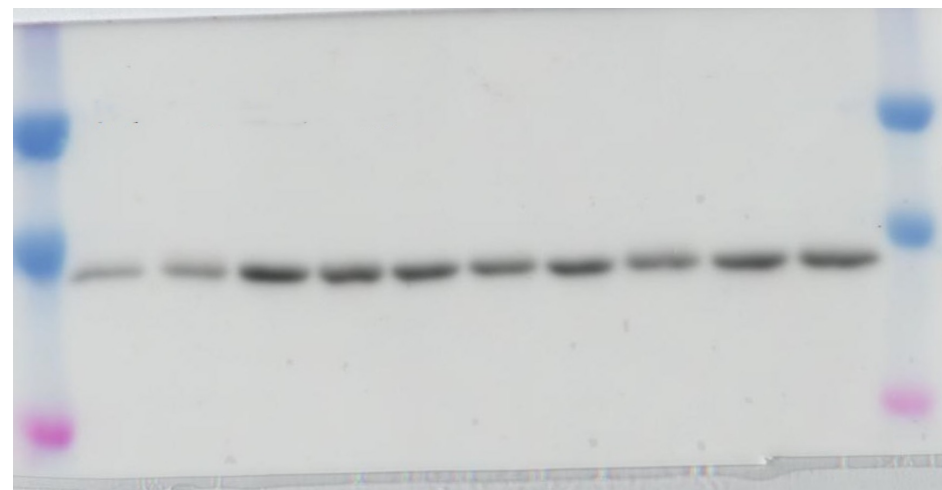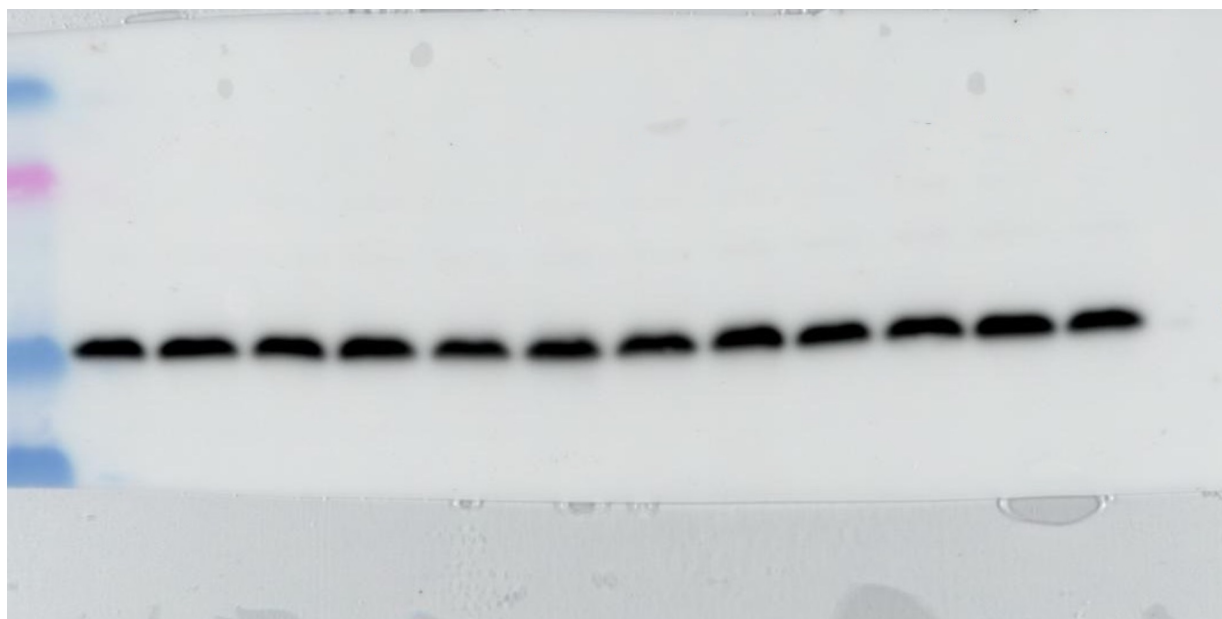

Supplement: 41420_2023_1364_MOESM2_ESM.pdf [file 41420_2023_1364_MOESM2_ESM.pdf]
